# Supplementary material
Source: ML conference proceedings conference paper supplement (https://proceedings.mlr.press/v164/huang22a.html)
Supplement: Supplementary file 1 [file huang22a-supp.zip]

Archive with 2 entries (2 files):
- lp3_cameraready_appendix.pdf
- __MACOSX/._lp3_cameraready_appendix.pdf
